# Supplementary material for: Implementation Challenges and Opportunities in Decentralized Methadone Service Delivery
Source: Research Square preprint supplement (doi:10.21203/rs.3.rs-7565402/v1), 2025-10-11
Supplement: Supplementary file 1 [file 099dc8a71ea9755bcf31526e.docx]

**In-Depth Interview Guide for Key Informants**

**Study Title:**  Adaptation and Pilot of a Social Network Intervention to Improve Retention in Medication-Assisted Treatment for Opioid Use Disorder in Tanzania

**U.S.-Based Principal Investigator: Haneefa Saleem**

**Tanzania-Based Principal Investigator: Iddi Haruna Nkya**

**IRB No.: IRB00019420**

**PI Version Date: Version 2.0/09.21.2022**

**_____________________________________________________________________________________**

**Introduction**

Thank you for taking the time to speak with me today. I want to give you the opportunity to tell me your thoughts about a program we would like to provide to individuals who are receiving methadone treatment, with the goal of helping them to stay on treatment and get the support they need. Please feel free to let me know if you do not feel comfortable with answering any questions and I will move on to the next question.

**Demographic Information**

Before we start, I would like to ask you a few questions:

- What type of work do you do?
- How long have you been doing this type of work?
- Can you please describe to me what you do to provide care, treatment, or counsel to people receiving methadone treatment?

**Intervention Components**

I would like to ask you about your thoughts on a program we are hoping to try with people who receive methadone treatment. The idea to try out this program came from interviews we did in the past with people receiving methadone where we heard from them about their needs and the things that might help them stay in methadone treatment. The program we would like to get your thoughts on and try is based on the idea that people who use illicit need support to change their drug use habits and close friends and family, whom I will call social supporters, are an important part of the support and treatment process. This program has different activities which would be done with participants in four different meetings. I would like to hear your thoughts about these activities. I will start with the social network mapping session.

*Social Network Mapping*

1. The first part of the program asks people on methadone treatment to think about the people in their life and write them down or draw them out on a piece of paper, noting what role they have and why type(s) of support they provide. [Show example drawing]. The idea is to help the person on treatment identify people in their life who may be best to help support them in their treatment and that these people would then attend each of the remaining three program sessions with the person on methadone treatment. What do you think about this type of activity overall?

[Probe]: Please tell me about any concerns you have about this type of activity for people on methadone treatment.

[Probe]: Please tell me what you think is good about this type of activity for people on methadone treatment.

1. Do you think this could be done in a group of MAT clients, or should this be done one-on-one with just the person receiving methadone treatment, the counsellor, and social supporters? Please tell me why.
2. Please tell me your thoughts about having social supporters there during this type of mapping activity.

[Probe] Do you think supporters should be there or not – why or why not?

[Probe] How many supporters do you think should be there?

1. Please describe for me if you think it will be easy or hard for people using methadone to create this type of support drawing.
2. Are there things that would help MAT clients to think about and identify social supporters for this type of activity?
3. Once social supporters are identified, can you tell me your thoughts about how to invite them to be involved in the program?

[Probe]: Who should invite the social supporters to participate in the program and why?

[Probe]: What type of information might be useful to social supporters to help them decided whether to participate in the program?

*Goal Setting*

1. The second part of the program is focused on setting goals around plans to reduce or abstain from drug and alcohol use, maintain treatment, and build participant confidence to stick to their treatment plan with the assistance of social supporters. What do you think about this type of activity overall?

[Probe]: Please tell me about any concerns you have about this type of activity for people on methadone treatment.

[Probe]: Please tell me what you think is good about this type of activity for people on methadone treatment.

1. How do you think social supporters can be involved in goal setting?
2. Do you think this could be done in a group of MAT clients, or should this be done one-on-one with just the person receiving methadone treatment, the counsellor, and social supporters? Please tell me why.
3. Do you think goal setting should be focused on completely stopping use of illicit or alcohol, or reducing drug and alcohol use to help with methadone treatment goals, and why?

*Developing Coping Skills*

1. The third part of the program is focused on developing coping skills to deal with high-risk situations where an individual may be likely to use illicit. This part of the program focuses on participants listing these high-risk situations in their lives and together with their social supporters and the program facilitator developing strategies to deal with these high-risk situations. Examples of high-risk situations could include being offered illicit or feeling cravings for illicit. Examples of coping strategies include developing skills to refuse illicit or developing skills to understand and address drug cravings. What do you think about this type of activity overall?

[Probe]: Please tell me about any concerns you have about this type of activity for people on methadone treatment.

[Probe]: Please tell me what you think is good about this type of activity for people on methadone treatment.

1. Do you think this could be done in a group of MAT clients, or should this be done one-on-one with just the person receiving methadone treatment, the counsellor, and social supporters? Please tell me why.
2. From your experience working with people receiving methadone treatment, what are some of the important skills they might need to deal with situations where they may be tempted to use illicit?

*Making Lifestyle Changes*

1. The fourth part of the program is focused on helping individuals receiving methadone treatment make changes to their lifestyle to help support their treatment. This part of the program focuses on having individuals receiving methadone treatment and their social supporters discuss and agree on a plan for a daily routine as well as identifying activities that are nice or pleasant things to do, with a focus on activities that involve being social with individuals who do not use illicit and are not on methadone treatment. What do you think about this type of activity overall?

[Probe]: Please tell me about any concerns you have about this type of activity for people on methadone treatment.

[Probe]: Please tell me what you think is good about this type of activity for people on methadone treatment.

1. Do you think it would be easy or hard for MAT clients to come up with a daily routine and nice activities to do, and why?
2. Do you think this could be done in a group of MAT clients, or should this be done one-on-one with just the person receiving methadone treatment, the counsellor, and social supporters? Please tell me why.
3. We have learned from an earlier part of this study that MAT clients can have a tough time finding ways to make money or generate income. In your opinion, how could we connect clients to income generating activities during the program?

**Overall Feedback**

1. Thinking about the four pieces of this program we have talked about (identifying social supporters, setting goals, developing coping skills, and making lifestyle changes), please tell me about anything else that you should be included in this type of program.
2. Which of the four program components (identifying social supporters, setting goals, developing coping skills, and making lifestyle changes), do you think is most important and why?
3. If you had to get rid of one of these program components (identifying social supporters, setting goals, developing coping skills, and making lifestyle changes), which would you choose and why?
4. Please tell me anything that we haven’t discussed that you think would make the program we have talked about today better.

**Implementation/Training Components**

1. Who do you think would be best to oversee or provide this type of program (e.g. clinicians, community outreach workers, counsellors…etc?) and why?
2. A number of MAT clients are also receiving HIV treatment and antiretroviral treatment. Please tell me your thoughts about how this program could work with their current care and treatment program?
3. How long do you think the four sessions should last and why?
4. When should the program sessions be held and why?
5. Where should the program sessions be held and why?
6. *[I would like your thoughts in addition to what you have already shared about the location to hold these program sessions. There are currently different options for MAT clients to collect their methadone – and if needed their HIV medication – at clinics in their communities instead of having to travel to the MAT clinic at Muhimbili. We want to understand more what MAT clients know about and how MAT clients view this option.]*
   1. What have you heard about this program?
   2. How is this program promoted to MAT clients?
   3. Please tell me about any reasons you can think of that a MAT client might want to or not want to collect their methadone from a clinic in their community instead of travelling to Muhimbili?

[Probe]: Please tell me about the reasons a MAT client might prefer to collect methadone from Muhimbili instead of a clinic in their community.

[Probe]: Please tell me about the reasons a MAT client might prefer to collect methadone from a clinic in their community instead of at Muhimbili.

- 1. Please tell me about the reasons MAT clients spend time on Muhibili hospital grounds or near the hospital after receiving their methadone and/or HIV medication?

[Probe] In your opinion, what could be done to encourage MAT clients to leave hospital grounds after receiving methadone?

1. Please tell me what you think about having social supporters attend program sessions.
2. Tell me about how you think this program could be best integrated or incorporated into existing programs for MAT clients?

[Probe]: Examples include Methadone Anonymous, Alcoholics Anonymous, and Behavior Modification Therapy

**Closing**

Thank you for taking the time to talk with me today. Is there anything else that you would like to share that you think would be important for me to know?
