# Supplementary material for: Implementation Challenges and Opportunities in Decentralized Methadone Service Delivery
Source: Research Square preprint supplement (doi:10.21203/rs.3.rs-7565402/v1), 2025-10-11
Supplement: Supplementary file 2 [file fb291e065a57b33f6a1b5b83.docx]

**JOHNS HOPKINS BLOOMBERG SCHOOL OF PUBLIC HEALTH**

**MUHIMBILI UNIVERSITY OF HEALTH AND ALLIED SCIENCES**

**Focus Group Guide**

**Study Title:**  Adaptation and Pilot of a Social Network Intervention to Improve Retention in Medication-Assisted Treatment for Opioid Use Disorder in Tanzania

**U.S.-Based Principal Investigator: Haneefa Saleem**

**Tanzania-Based Principal Investigator: Iddi Haruna Nkya**

**IRB No.: IRB00019420**

**PI Version Date: Version 1.0/02.17.2022**

**_____________________________________________________________________________________**

**Introduction**

Thank you all for being here today. I want to remind everyone that there are no right or wrong answers. We are here to learn from you and hear your ideas and suggestions. We want all of you to tell us what you think and learn from you and your experiences.

______________________ will lead the discussion today by asking a question to the whole group and call on people to get their thoughts. We want to hear from everyone.

Does anyone have any questions before we start?

**Intervention**

As you know, today we are going to talk about a program we are hoping to try with people who receive methadone. The idea to try out this program came from interviews we did in the past with people receiving methadone treatment where we heard from them about their needs and the things that might help them stay in methadone treatment. The idea behind this program is to help people on methadone to stay adherent and in treatment with the support of others in their social networks. This program has different activities which would be done with participants in four different meetings. I would like to hear your thoughts about these activities.

In the first part of the program people on methadone treatment are asked to think about the people in their life and write them down on paper or draw them out on a piece of paper, saying what role each person has and what type(s) of support they provide. This is called social network mapping. With the help of the person facilitating the program, participants will identify and invite people from their social network to join them for the other parts of the program to help support them. In the second part of the program, participants are asked to work on setting goals around plans to reduce or abstain from drug and alcohol use, maintain methadone treatment and build confidence to stick to their treatment plan with the assistance of social supporters. In the third part of the program participants list different high-risk situations in their lives where they might be most tempted or likely to use illicit drugs, and together with their social supporters and the program facilitator develop strategies to deal with or avoid these high-risk situations. In the fourth and final part of the program individuals receiving methadone therapy and their social supporters discuss and agree on a plan for a daily routine as well as identifying activities that are nice things to do, with a focus on activities that involve being social with other people who do not use illicit drugs and are not on methadone treatment (such as attending church, going to a family meal or gathering).

*Social Network Mapping*

I would first like to talk about this idea I mentioned of social network mapping. I will describe an example of a person receiving methadone treatment to you, and then I would like us to make a social network map together. Here is the example: James is a 30-year-old man who started on methadone 4 months ago. James has agreed to participate in our program and this is his first of four meetings. James has been asked by a counsellor to draw his social network. James was told by the counsellor who is leading this activity to include friends, family members, romantic or sexual partners, and anyone else who James regularly interacts with and who provide some type of emotional support (someone to talk to, someone who supports his feelings, provides love), tangible support (someone who provides things like money, bus fare, food), or advice and information (how to get to the clinic daily, the best ways to take treatment). When asked to draw his social network, James was advised to not include individuals who also use illicit drugs. Can you help me think of who James might include in his map [draw out map]. [If developing map is a challenge, show example drawing of James’ social network map].

1. What do you all think about this type of activity?

[Probe] Can you tell if you think it would be easy or hard for someone to draw this type of map? Why or why not?

1. What do you think about asking James to not include other individuals who use illicit drugs in the map?
2. How do you think someone on methadone treatment would feel about making a map of their social network?

[Probe] Please tell me about anything that someone might not like about drawing out a social network map.

[Probe] Please tell me about anything that would make it easier for someone to draw out a social network map.

Once the social network map is done, James will work with the counsellor to identify people in his network whom he could invite to participate in the rest of the program with him, in order to support him staying on methadone treatment. James decided that his mom and his girlfriend (who does not use illicit drugs but does drink alcohol) were the best people to support him.

1. What suggestions do you have for the best way for James to invite people in his social network to participate in the program?
2. What concerns do you have, if any, about how family members or other supporters might feel or react to being invited to participate in the program?
3. What information about methadone treatment do you think would be helpful for James’ mom and girlfriend to know about in order to support him?

[Probe]: Do family members or other supporters often understand how long someone will take methadone for? Why or why not?

*Goal Setting*

James has now identified people, his mom and girlfriend, from his social network map to come to the next three program sessions with him and help support him. During his second program meeting and with the help of his supporters, James will set goals to help him continue methadone treatment. Examples of these goals could include abstaining from drug or alcohol use all together, such as James saying “Monday I am going to stop drinking alcohol” or deciding to only drink alcohol once a week.

1. What do you all think about this type of activity?

[Probe] Can you tell if you think it would be easy or hard for James to set goals?

1. What do you think about setting goals to abstain or not use any illicit drugs or alcohol as opposed to trying to reduce drug and alcohol use?

[Probe]: Is quitting altogether better or worse than deciding to use less illicit drugs or alcohol?

[Probe]: How easy or hard is it to set goals to quit using illicit drugs or alcohol entirely?

1. Do you think this activity should be done with James and his social supporters and the counsellor, or should it be done in a group of other methadone clients and their social supporters, and why?

*Developing Coping Skills*

As I mentioned, the third meeting of the program involves thinking about ways to cope with situations where James may be tempted to use illicit drugs. With the help of his social supporters, his mom and girlfriend, James will list different situations in his life that might make him tempted to use illicit drugs. Can you please help me list out situations that might make James be tempted to use illicit drugs? [Write or draw out list on flip chart] Based on this list James, with input from his mom and girlfriend and the counsellor, comes up with ideas for how he will cope with each type of situation. What are some of the coping solutions we can come up with for the list of situations? [Write or draw out solutions alongside list on flip chart].

1. What do you all think about this type of activity?

[Probe] Do you think it would be easy or hard for someone to make this type of list and come up with ideas for how to deal with each situation? Why or why not?

1. How do you feel about James’ mom and girlfriend being a part of this activity?
2. Do you think this activity should be done with James and his social supporters and the counsellor alone, or should it be done in a group of other methadone clients and their social supporters, and why?

*Making Lifestyle Changes*

The last meeting of the program is about helping James make changes to his life. In this meeting James, with the help of his mom and girlfriend, is asked to map out a daily routine for himself. James writes out his current daily routine [show example] and what his goal for a daily routine is. Then, with the help of the counsellor, everyone discusses what James needs to do and how his mom and girlfriend can help support him in achieving his daily routine. Additionally, as part of his daily routine, James is asked to think about things he enjoys doing that do not involve illicit drugs. Can you come up with some activities that James might do that would be enjoyable but do not involve illicit drugs? Together James, the counsellor, and his mom and girlfriend decide how these things can become part of James’ weekly or daily routine. Which of the activities we have listed could be part of James’ daily routine?

1. What do you all think about this type of activity?

[Probe] Tell me about any challenges you think James would encounter when putting together an ideal daily routine?

1. How do you feel about James’ mom and girlfriend being a part of this activity?
2. Do you think this activity should be done with James and his social supporters and the counsellor alone, or should it be done in a group of other methadone clients and their social supporters, and why?
3. Working to earn money is often a part of people’s daily routines but can be difficult for people receiving methadone. What types of income generating activities could James incorporate into his daily routine? How do these fit in with the routine we have drawn out?

**Overall Feedback**

1. What information would be important for family and friends (or other social supporters) of MAT clients to know to better support MAT clients in this program?
2. One thing we learned from interviews we did with MAT clients in the past was that lack of money or work made MAT adherence and retention challenging. Thinking about the program we have discussed, do you have ideas about ways we could include activities to help MAT clients earn money or support them in their goals to work and earn money?
3. Thinking about the four pieces of this program we have talked about (identifying social supporters, setting goals, developing coping skills, and making lifestyle changes), please tell me about anything else that you should be included in this type of program.
4. Thinking about the program, what things do you think we should be thinking about in terms of differences between men and women in how we deliver the program?
5. Please tell me anything that we haven’t discussed that you think would make the program we have talked about today better.

**Implementation/Training Components**

1. Who do you think would be best to oversee or provide this type of program (e.g., clinicians, community outreach workers, counsellors…etc?) and why?
2. A number of people receiving methadone treatment are also receiving HIV treatment and antiretroviral therapy. Please tell me your thoughts about how this program could work with their current care and treatment program?
3. How long do you think the four sessions should last and why?
4. How often should the sessions be held or spaced apart? For example, should they be once per week, once every two weeks, once a month?
5. When should the program sessions be held and why?

[Probe]: What times of the day should the program sessions be held?

[Probe]: Are there days of the week that would be best to have these sessions and why?

1. Where should the program sessions be held and why?
2. *[I would like your thoughts in addition to what you have already shared about the location to hold these program sessions. There are currently different options for MAT clients to collect their methadone – and if needed their HIV medication – at clinics in their communities instead of having to travel to the MAT clinic at Muhimbili. We want to understand more what MAT clients know about and how MAT clients view this option.]*
   1. What have you heard about this program?
   2. Please tell me about any reasons you can think of that a MAT client might want to or not want to collect their methadone from a clinic in their community instead of travelling to Muhimbili?

[Probe]: Please tell me about the reasons a MAT client might prefer to collect methadone from Muhimbili instead of a clinic in their community.

[Probe]: Please tell me about the reasons a MAT client might prefer to collect methadone from a clinic in their community instead of at Muhimbili.

- 1. Please tell me about the reasons MAT clients spend time on Muhimbili hospital grounds or near the hospital after receiving their methadone and/or HIV medication?

1. Tell me about how you think this program could be best integrated or incorporated into existing programs for MAT clients?

**Closing**

Thank you for taking the time to talk with me today. Is there anything else that you would like to share that you think would be important for me to know?
